# Supplementary material for: Enhancing the Production of the Phenolic Extracts of Asparagus Using an Advanced Green Process
Source: MDPI journal article supplement (doi:10.3390/metabo12100951), 2022-10-06
Supplement: s1 [file s1]

**Table S1.** Experimental conditions of pressurized liquid extraction.

| Experiment | T <sup>1</sup> (°C) | Ethanol (%) | t <sup>2</sup> (min) | S-S (w/w) |
|------------|---------------------|-------------|----------------------|-----------|
| PLE 1      | 36.00               | 50.00       | 20.00                | 3.50      |
| PLE 2      | 60.00               | 20.00       | 30.00                | 5.00      |
| PLE 3      | 60.00               | 80.00       | 10.00                | 2.00      |
| PLE 4      | 60.00               | 80.00       | 30.00                | 5.00      |
| PLE 5      | 60.00               | 20.00       | 10.00                | 2.00      |
| PLE 6      | 60.00               | 80.00       | 10.00                | 5.00      |
| PLE 7      | 60.00               | 20.00       | 30.00                | 2.00      |
| PLE 8      | 60.00               | 20.00       | 10.00                | 5.00      |
| PLE 9      | 60.00               | 80.00       | 30.00                | 2.00      |
| PLE 10     | 110.00              | 50.00       | 20.00                | 3.50      |
| PLE 11     | 110.00              | 50.00       | 5.00                 | 3.50      |
| PLE 12     | 110.00              | 50.00       | 20.00                | 1.00      |
| PLE 13     | 110.00              | 50.00       | 35.00                | 3.50      |
| PLE 14     | 110.00              | 6.00        | 20.00                | 3.50      |
| PLE 15     | 110.00              | 50.00       | 20.00                | 3.50      |
| PLE 16     | 110.00              | 95.00       | 20.00                | 3.50      |
| PLE 17     | 110.00              | 50.00       | 20.00                | 6.00      |
| PLE 18     | 160.00              | 80.00       | 10.00                | 5.00      |
| PLE 19     | 160.00              | 20.00       | 30.00                | 5.00      |
| PLE 20     | 160.00              | 20.00       | 30.00                | 2.00      |
| PLE 21     | 160.00              | 20.00       | 10.00                | 2.00      |
| PLE 22     | 160.00              | 20.00       | 10.00                | 5.00      |

|        |        |       |       |      |
|--------|--------|-------|-------|------|
| PLE 23 | 160.00 | 80.00 | 30.00 | 5.00 |
| PLE 24 | 160.00 | 80.00 | 10.00 | 2.00 |
| PLE 25 | 184.00 | 50.00 | 20.00 | 3.50 |

<sup>1</sup> T: temperature.

<sup>2</sup> t: time.

<sup>3</sup> S-S: sand-sample ratio.

**Table S2.** Calibration parameters.

| Standard            | Calibration Range<br>(mg/L) | Calibration Curve    | R <sup>2</sup> |
|---------------------|-----------------------------|----------------------|----------------|
| Chlorogenic acid    | 0.10 - 10                   | y = 392180x - 86822  | 0,9897         |
| Ferulic acid        | 0.10 - 75                   | y = 14525x + 230871  | 0,9937         |
| Quercetin-glucoside | 0.10 - 5                    | y = 1000000x + 41654 | 0,9934         |
| Quinic acid         | 0.10 - 100                  | y = 361668x - 80932  | 0,9831         |
| Rutin               | 0.10 - 100                  | y = 776936x + 43050  | 0,9958         |

**Table S3.** Extraction yield of different PLE experiments (1-25) and SLE extraction.

| PLE<br>Experiments | Yield<br>(%) | PLE/SLE<br>Experiments | Yield<br>(%) |
|--------------------|--------------|------------------------|--------------|
| PLE 1              | 20.03        | PLE 14                 | 34.24        |
| PLE 2              | 23.86        | PLE 15                 | 36.57        |
| PLE 3              | 15.60        | PLE 16                 | 39.66        |
| PLE 4              | 50.25        | PLE 17                 | 43.29        |
| PLE 5              | 43.80        | PLE 18                 | 50.32        |

|        |       |        |       |
|--------|-------|--------|-------|
| PLE 6  | 21.61 | PLE 19 | 70.01 |
| PLE 7  | 46.29 | PLE 20 | 61.72 |
| PLE 8  | 23.11 | PLE 21 | 58.34 |
| PLE 9  | 23.64 | PLE 22 | 30.22 |
| PLE 10 | 35.61 | PLE 23 | 50.93 |
| PLE 11 | 29.00 | PLE 24 | 61.69 |
| PLE 12 | 35.58 | PLE 25 | 33.38 |
| PLE 13 | 37.52 | SLE    | 30.28 |

**Table S4.** Total and individual content of phenolic compounds in the PLE and SLE extract. Value expressed in mg compound/g dry extract as  $\bar{X} \pm SD$

| Compound                      | PLE 1         | PLE 2         | PLE 3         | PLE 4       | PLE 5         | PLE 6         | PLE 7         | PLE 8         | PLE 9         | PLE 10        | PLE 11        | PLE 12        | PLE 13        |
|-------------------------------|---------------|---------------|---------------|-------------|---------------|---------------|---------------|---------------|---------------|---------------|---------------|---------------|---------------|
| Chlorogenic acid              | 0.34 ± 0.02   | 0.55 ± 0.03   | 0.28 ± 0.02   | 2.42 ± 0.05 | 0.17 ± 0.01   | 0.55 ± 0.02   | 0.20 ± 0.02   | 0.605 ± 0.008 | 1.02 ± 0.07   | 0.74 ± 0.02   | 1.00 ± 0.05   | 1.12 ± 0.06   | 1.05 ± 0.06   |
| Coumaroylquinic acid          | 0.59 ± 0.02   | 0.19 ± 0.02   | 0.279 ± 0.006 | 0.54 ± 0.04 | 0.289 ± 0.001 | 0.54 ± 0.03   | 0.266 ± 0.009 | 0.18 ± 0.02   | 0.379 ± 0.006 | 0.29 ± 0.02   | 0.34 ± 0.01   | 0.30 ± 0.02   | 0.20 ± 0.04   |
| Feruloylquinic acid           | 24.6 ± 0.5    | 13 ± 2        | 23 ± 1        | 26 ± 2      | 17.0 ± 0.2    | 30 ± 2        | 17.1 ± 0.5    | 11.1 ± 0.3    | 16 ± 1        | 12.3 ± 0.6    | 13.8 ± 0.2    | 13.8 ± 0.6    | 14.0 ± 0.9    |
| Feruloyl hexose               | 15.1 ± 0.3    | 4.6 ± 0.2     | 13.0 ± 0.7    | 17 ± 2      | 9.98 ± 0.02   | 16.1 ± 0.7    | 11.8 ± 0.7    | 3.6 ± 0.2     | 6.8 ± 0.3     | 6.3 ± 0.5     | 6.9 ± 0.1     | 6.3 ± 0.4     | 5.9 ± 0.3     |
| Quercetin glucosyl rutinoside | 4.04 ± 0.03   | 0.256 ± 0.003 | 0.491 ± 0.007 | 4.2 ± 0.1   | 3.66 ± 0.03   | 4.1 ± 0.1     | 0.402 ± 0.007 | 0.29 ± 0.01   | 0.48 ± 0.03   | 0.34 ± 0.01   | 0.42 ± 0.01   | 0.390 ± 0.008 | 0.33 ± 0.02   |
| Rutin                         | 12.6 ± 0.1    | 6.90 ± 0.06   | 10.6 ± 0.5    | 12.9 ± 0.5  | 9.8 ± 0.8     | 13.6 ± 0.3    | 8.8 ± 0.3     | 7.4 ± 0.2     | 9.8 ± 0.4     | 8.52 ± 0.04   | 8.2 ± 0.2     | 9.3 ± 0.4     | 8 ± 1         |
| Quercetin-glucoside           | 0.092 ± 0.002 | 0.039 ± 0.006 | 0.061 ± 0.004 | 0.09 ± 0.01 | 0.050 ± 0.003 | 0.102 ± 0.002 | 0.050 ± 0.002 | 0.043 ± 0.002 | 0.086 ± 0.003 | 0.072 ± 0.003 | 0.070 ± 0.008 | 0.071 ± 0.005 | 0.070 ± 0.002 |

|                                 |               |               |               |             |               |               |               |               |             |              |               |             |               |
|---------------------------------|---------------|---------------|---------------|-------------|---------------|---------------|---------------|---------------|-------------|--------------|---------------|-------------|---------------|
| Kaempferol-rutinoside           | 0.197 ± 0.006 | 0.173 ± 0.007 | 0.193 ± 0.006 | 0.21 ± 0.02 | 0.15 ± 0.02   | 0.25 ± 0.01   | 0.146 ± 0.009 | 0.18 ± 0.01   | 0.21 ± 0.01 | 0.16 ± 0.01  | 0.171 ± 0.006 | 0.19 ± 0.01 | 0.184 ± 0.003 |
| Isorhamnetin-rutinoside         | 0.252 ± 0.008 | 0.139 ± 0.004 | 0.21 ± 0.01   | 0.25 ± 0.01 | 0.181 ± 0.003 | 0.30 ± 0.01   | 0.160 ± 0.007 | 0.015 ± 0.002 | 0.24 ± 0.01 | 0.160 ± 0.03 | 0.183 ± 0.003 | 0.20 ± 0.02 | 0.157 ± 0.005 |
| Dicoumaroylglycerol             | 0.51 ± 0.01   | 4.078 ± 0.008 | 9 ± 1         | 4.2 ± 0.2   | 0.63 ± 0.08   | 8.9 ± 0.3     | 8.9 ± 0.5     | 3.6 ± 0.3     | 5.0 ± 0.4   | 4.1 ± 0.3    | 3.7 ± 0.1     | 5.3 ± 0.3   | 5.7 ± 0.6     |
| Coumaroylferuloyl glycerol      | 9.3 ± 0.3     | 4.4 ± 0.3     | 12 ± 2        | 12 ± 1      | 10.3 ± 0.2    | 11.5 ± 0.4    | 11 ± 1        | 4.9 ± 0.2     | 8.3 ± 0.9   | 5.5 ± 0.2    | 5.7 ± 0.4     | 6.9 ± 0.4   | 8.0 ± 0.9     |
| Diferuloyl glycerol             | 0.37 ± 0.04   | 0.28 ± 0.02   | 0.50 ± 0.04   | 0.36 ± 0.05 | 0.343 ± 0.006 | 0.279 ± 0.004 | 0.280 ± 0.009 | 0.405 ± 0.004 | 3.6 ± 0.4   | 0.42 ± 0.04  | 0.43 ± 0.02   | 3.7 ± 0.4   | 3.61 ± 0.04   |
| <b>Total Phenolic Acids</b>     | 50.8 ± 0.7    | 26 ± 1        | 57 ± 3        | 63 ± 5      | 40 ± 2        | 67 ± 2        | 49 ± 2        | 24.5 ± 0.2    | 41 ± 3      | 29.3 ± 0.7   | 32 ± 2        | 38 ± 1      | 39 ± 2        |
| <b>Total Flavonoids</b>         | 17.2 ± 0.1    | 7.49 ± 0.06   | 11.6 ± 0.5    | 17.7 ± 0.7  | 13.9 ± 0.9    | 18.4 ± 0.3    | 9.6 ± 0.3     | 8.1 ± 0.2     | 10.8 ± 0.4  | 9.24 ± 0.05  | 9.0 ± 0.2     | 10.1 ± 0.4  | 9 ± 1         |
| <b>Total Phenolic Compounds</b> | 68.0 ± 0.6    | 34 ± 1        | 69 ± 3        | 80 ± 5      | 54 ± 3        | 86 ± 2        | 59 ± 2        | 32.6 ± 0.1    | 52 ± 3      | 38.5 ± 0.7   | 41.2 ± 1.6    | 48 ± 1      | 48 ± 2        |

**Table S4 continuation.** Total and individual content of phenolic compounds in the PLE and SLE extract. Value expressed in mg compound/g dry extract as  $\bar{X} \pm \text{SD}$

| Compound             | PLE 14      | PLE 15      | PLE 16        | PLE 17      | PLE 18        | PLE 19      | PLE 20      | PLE 21        | PLE 22        | PLE 23      | PLE 24      | PLE 25      | SLE           |
|----------------------|-------------|-------------|---------------|-------------|---------------|-------------|-------------|---------------|---------------|-------------|-------------|-------------|---------------|
| Chlorogenic acid     | 0.4 ± 0.1   | 1.3 ± 0.3   | 1.5 ± 0.2     | 1.43 ± 0.07 | 0.94 ± 0.05   | 0.66 ± 0.04 | 0.70 ± 0.04 | 0.378 ± 0.002 | 0.41 ± 0.06   | 0.50 ± 0.05 | 0.67 ± 0.03 | 0.60 ± 0.03 | 0.209 ± 0.008 |
| Coumaroylquinic acid | 0.09 ± 0.01 | 0.27 ± 0.03 | 0.370 ± 0.008 | 0.25 ± 0.02 | 0.163 ± 0.004 | 0.11 ± 0.01 | ND          | 0.059 ± 0.005 | 0.081 ± 0.002 | 0.15 ± 0.03 | 0.10 ± 0.02 | 0.13 ± 0.03 | ND            |
| Feruloylquinic acid  | 7.2 ± 0.4   | 14.6 ± 0.9  | 24.2 ± 0.4    | 15.7 ± 0.7  | 14.2 ± 0.4    | 8.4 ± 0.2   | 9.0 ± 0.6   | 5.3 ± 0.2     | 6 ± 1         | 11 ± 2      | 8.3 ± 0.9   | 9 ± 1       | 0.381 ± 0.006 |
| Feruloyl hexose      | 0.18 ± 0.04 | 6.2 ± 0.5   | 7.9 ± 0.9     | 5.3 ± 0.7   | 5.2 ± 0.5     | 0.65 ± 0.06 | ND          | ND            | ND            | 3.8 ± 0.4   | 0.39 ± 0.06 | 0.45 ± 0.04 | 0.089 ± 0.007 |

|                                     |                  |                  |                |                  |                  |                  |                  |                  |                  |                  |                    |                  |                    |
|-------------------------------------|------------------|------------------|----------------|------------------|------------------|------------------|------------------|------------------|------------------|------------------|--------------------|------------------|--------------------|
| Quercetin glucosyl<br>rutinoside    | 0.20 ±<br>0.01   | 0.373 ±<br>0.004 | 0.39 ±<br>0.02 | 0.407 ±<br>0.004 | 0.33 ±<br>0.01   | 0.25 ±<br>0.02   | 0.234 ±<br>0.008 | 0.161 ±<br>0.004 | 0.16 ±<br>0.02   | 0.122 ±<br>0.008 | 0.197 ±<br>0.009   | 0.209 ±<br>0.002 | 0.030 ±<br>0.002   |
| Rutin                               | 5.93 ±<br>0.08   | 8.9 ± 0.2        | 11 ± 1         | 9.5 ± 0.4        | 8.9 ± 0.2        | 6.7 ± 0.1        | 6.2 ± 0.3        | 5.7 ± 0.1        | 5.7 ± 0.1        | 7.8 ± 0.8        | 6.7 ± 0.1          | 6.7 ±<br>0.07    | 0.53 ±<br>0.06     |
| Quercetin-glucoside                 | 0.023 ±<br>0.003 | 0.064 ±<br>0.004 | 0.17 ±<br>0.01 | 0.073 ±<br>0.006 | 0.072 ±<br>0.002 | 0.050 ±<br>0.004 | 0.034 ±<br>0.003 | 0.040 ±<br>0.003 | 0.060 ±<br>0.001 | 0.09 ±<br>0.01   | 0.0819 ±<br>0.0005 | 0.082 ±<br>0.004 | 0.0060 ±<br>0.0004 |
| Kaempferol-<br>rutinoside           | 0.121 ±<br>0.001 | 0.196 ±<br>0.009 | 0.49 ±<br>0.04 | 0.23 ±<br>0.01   | 0.194 ±<br>0.007 | 0.130 ±<br>0.006 | 0.115 ±<br>0.006 | 0.084 ±<br>0.004 | 0.099 ±<br>0.002 | 0.173 ±<br>0.009 | 0.987 ±<br>0.008   | 0.110 ±<br>0.009 | 0.018 ±<br>0.001   |
| Isorhamnetin-<br>rutinoside         | 0.111 ±<br>0.005 | 0.177 ±<br>0.001 | 0.37 ±<br>0.02 | 0.224 ±<br>0.004 | 0.164 ±<br>0.007 | 0.12 ±<br>0.02   | 0.103 ±<br>0.005 | 0.074 ±<br>0.003 | 0.088 ±<br>0.001 | 0.13 ±<br>0.01   | 0.09 ±<br>0.01     | 0.090 ±<br>0.009 | 0.026 ±<br>0.001   |
| Dicoumaroylglycerol                 | 0.334 ±<br>0.006 | 4.7 ± 0.5        | 12 ± 2         | 3.6 ± 0.2        | 6.5 ± 0.4        | 0.50 ±<br>0.06   | 0.47 ±<br>0.04   | 0.32 ±<br>0.06   | 3.5 ± 0.3        | 6.4 ± 0.7        | 3.3 ± 0.4          | 4.3 ± 0.1        | 0.066 ±<br>0.006   |
| Coumaroylferuloyl<br>glycerol       | 3.3 ± 0.2        | 6.0 ± 0.2        | 15 ± 2         | 4.7 ± 0.2        | 9.3 ± 0.1        | 4.7 ± 0.4        | 4.4 ± 0.1        | 0.44 ±<br>0.08   | 5.3 ± 0.6        | 10.7 ±<br>0.9    | 6.8 ± 0.7          | 7.2 ± 0.3        | 0.097 ±<br>0.006   |
| Diferuloyl glycerol                 | 0.17 ±<br>0.01   | 0.54 ±<br>0.01   | 5.1 ± 0.5      | 0.34 ±<br>0.04   | 4.5 ± 0.4        | 0.4 ±<br>0.05    | 0.35 ±<br>0.02   | 0.28 ±<br>0.05   | 0.53 ±<br>0.03   | 4.6 ± 0.3        | 0.57 ±<br>0.04     | 3.4 ± 0.2        | 0.069 ±<br>0.004   |
| <b>Total Phenolic<br/>Acids</b>     | 11.8 ±<br>0.5    | 34.0 ±<br>0.7    | 64 ± 8         | 3.1 ± 0.7        | 41 ± 1           | 15.1 ±<br>0.5    | 15.1 ±<br>0.5    | 6.8 ± 0.2        | 15.1 ±<br>0.9    | 36 ± 2           | 20 ± 2             | 24.8 ±<br>0.8    | 0.91 ±<br>0.02     |
| <b>Total Flavonoids</b>             | 6.4 ± 0.1        | 9.7 ± 0.2        | 13 ± 1         | 10.4 ±<br>0.3    | 9.6 ± 0.2        | 7.3 ± 0.2        | 8 ± 1            | 6.0 ± 0.1        | 6.1 ± 0.1        | 8.3 ± 0.8        | 7.1 ± 0.2          | 7.15 ±<br>0.07   | 0.61 ±<br>0.06     |
| <b>Total Phenolic<br/>Compounds</b> | 18.2 ±<br>0.6    | 43.7 ±<br>0.9    | 77 ± 9         | 42.5 ±<br>0.4    | 50 ± 2           | 22.4 ±<br>0.3    | 23 ± 1           | 12.9 ±<br>0.2    | 21 ± 1           | 45 ± 3           | 27 ± 3             | 31.9 ±<br>0.7    | 1.52 ±<br>0.04     |
